# Supplementary material for: Comparison of growth characteristics of in vitro cultured granulosa cells from geese follicles at different developmental stages
Source: PubMed Central journal article supplement (PMC5920135; doi:10.1042/bsr20171361), 2018-04-27

The original pictures from 96 h to 168 h for pre-hierarchical, F4-F2 and F1 GCs:

Pre-hierarchical GCs:

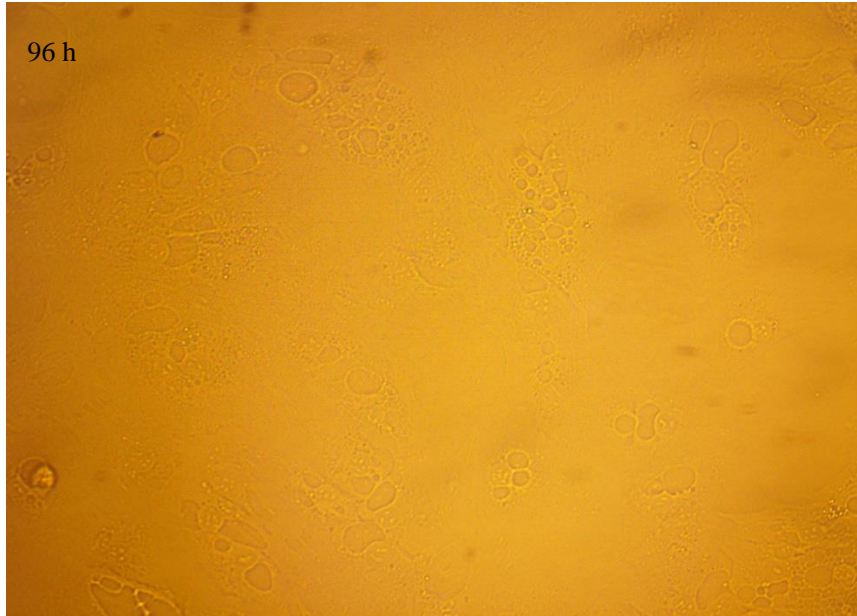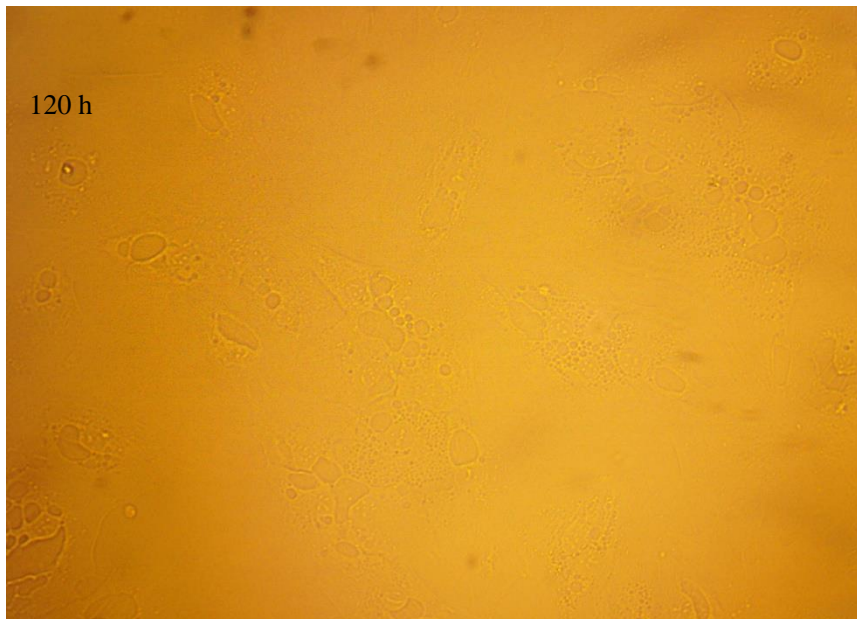

144 h

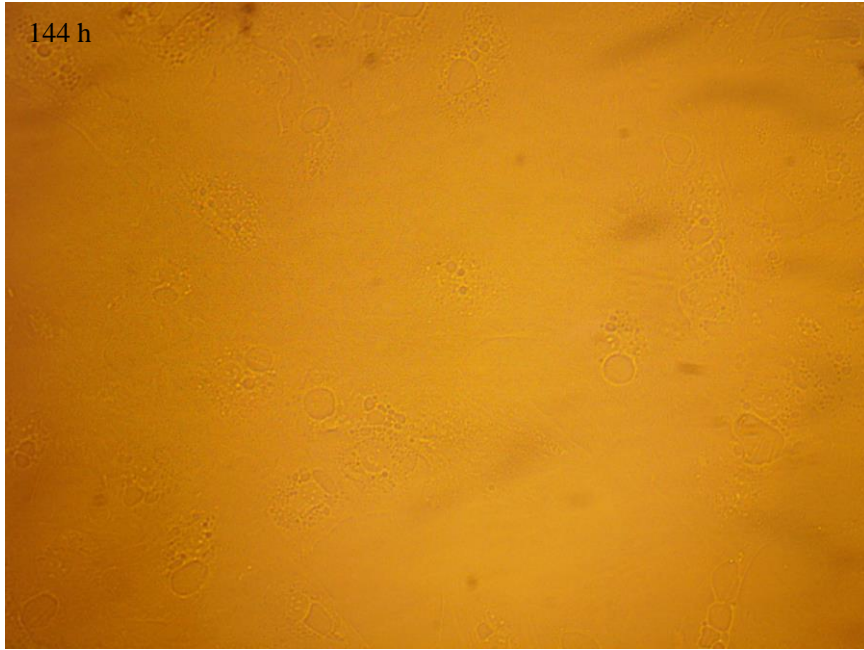

168 h

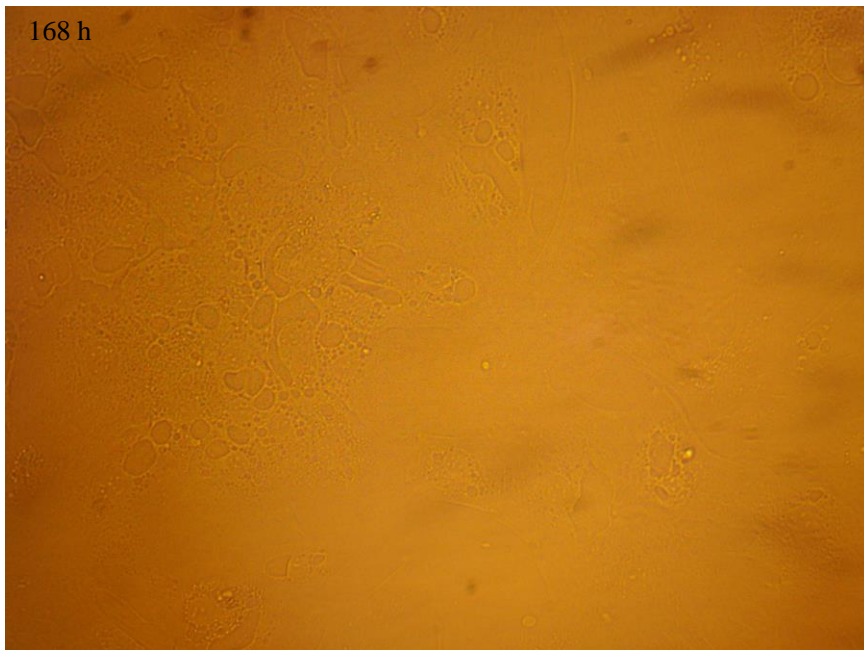

F4-F2 GCs:

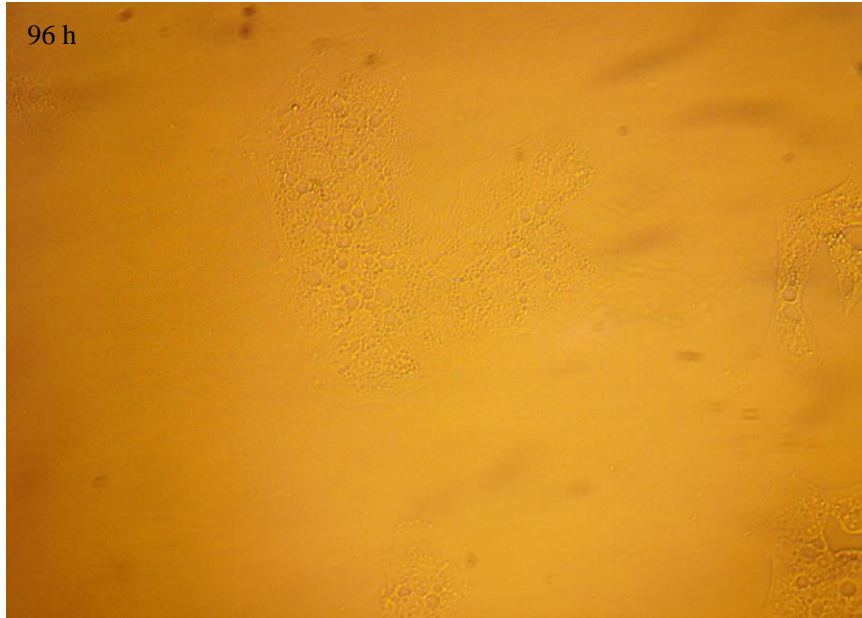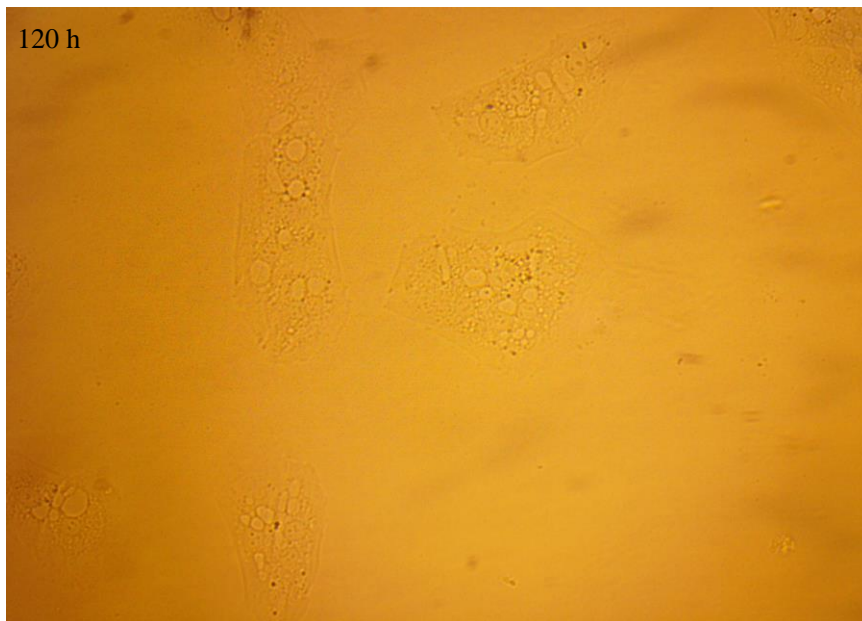



144 h

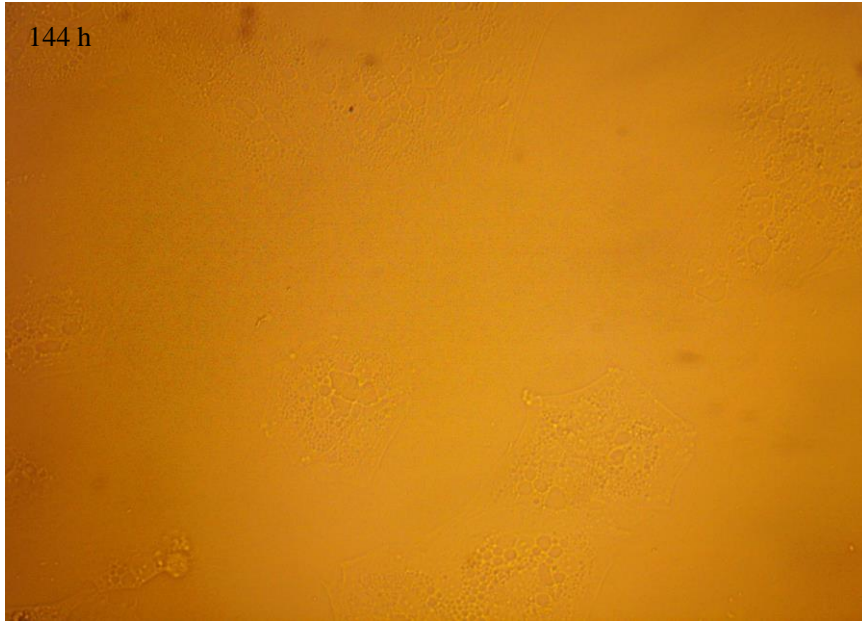

168 h

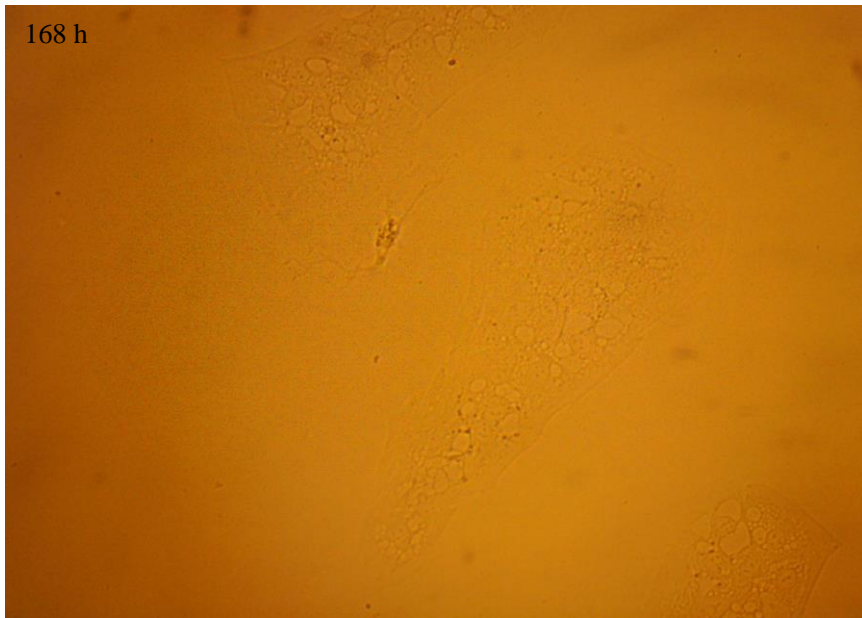

F1 GCs:

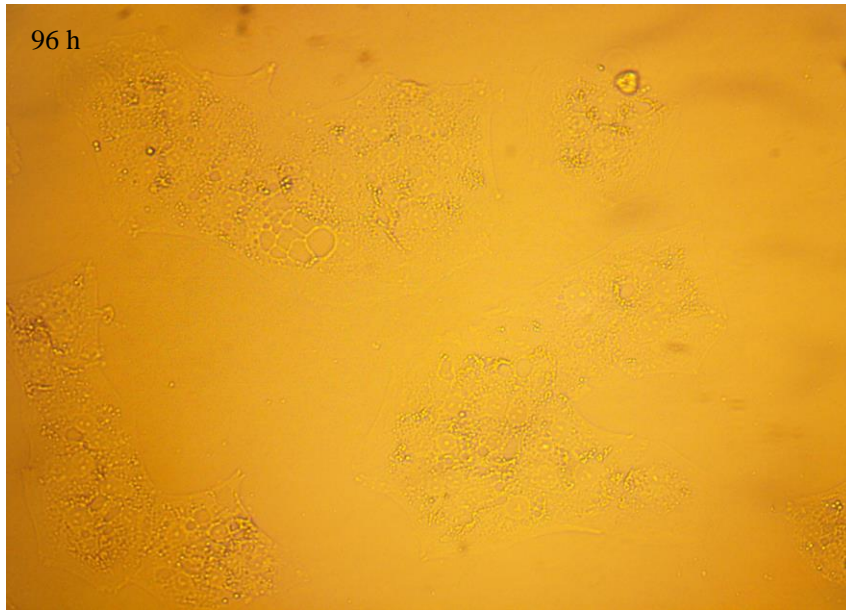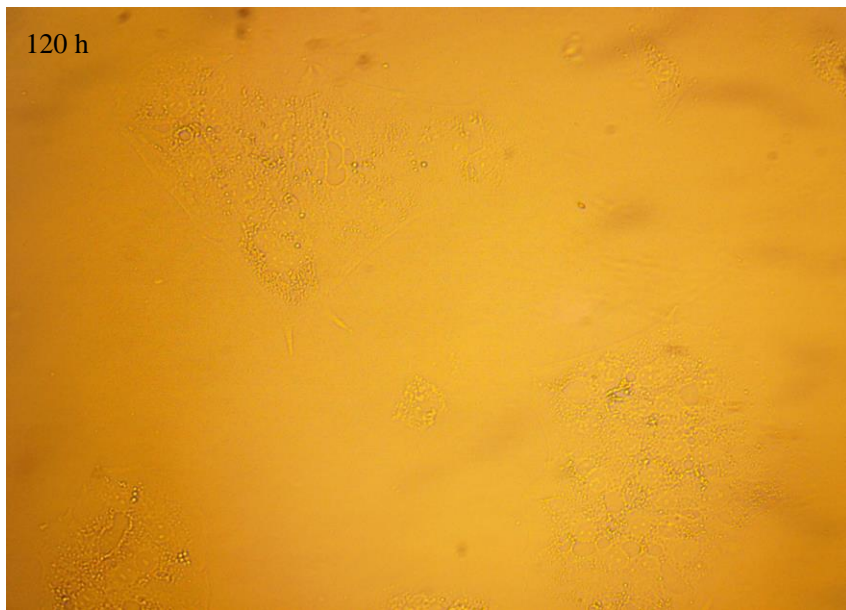

144 h

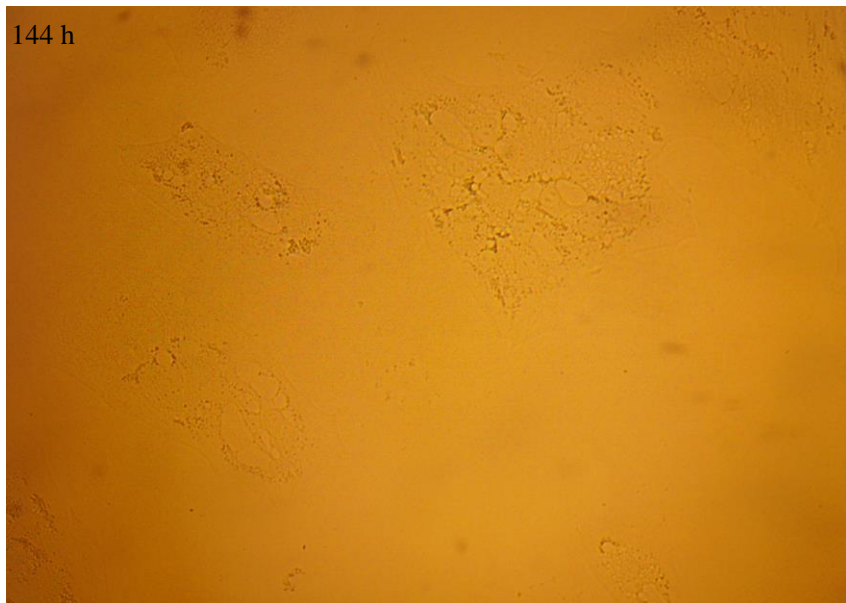

168 h

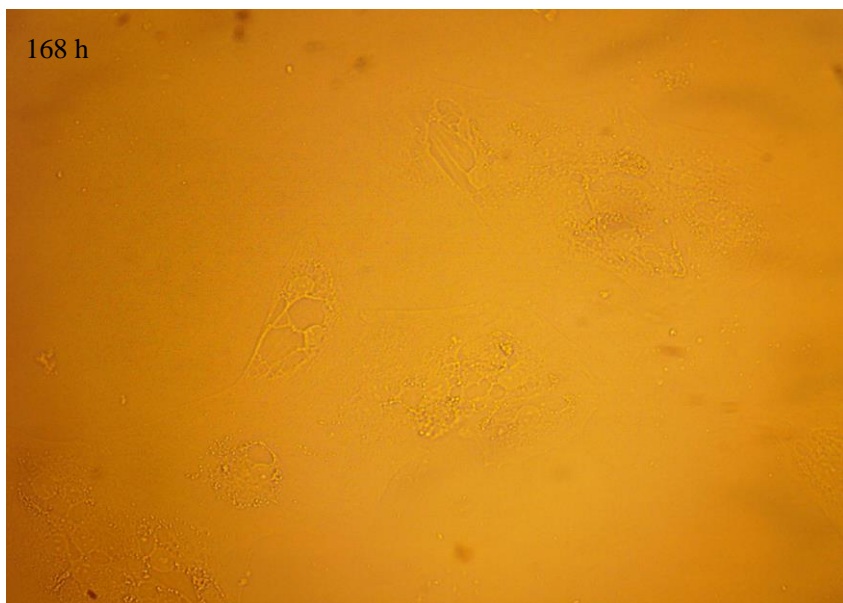

Supplement: bsr20171361_Supp1.pdf [file bsr20171361_Supp1.pdf]
